# Supplementary material
Source: PubMed Central journal article supplement (PMC7332222)
Supplement: NIHMS1542047-supplement-1.pdf [file NIHMS1542047-supplement-1.pdf]

**Table S1. Related to Figure 4; List of GPCRs screened**

| GPCR         | Source (Harvard PlasmID if ID) |
|--------------|--------------------------------|
| ADORA1       | HsCD00042302                   |
| ADORA2A      | HsCD00370996                   |
| ADORA2B      | HsCD00040665                   |
| ADORA3       | HsCD00041411                   |
| ADRB2        | HsCD00365107                   |
| ADRB3        | HsCD00378443                   |
| AGTR2        | HsCD00022325                   |
| AVPR1A       | HsCD00378494                   |
| CCR5         | HsCD00335461                   |
| CMKLR1       | HsCD00370679                   |
| CRHR1        | HsCD00021892                   |
| CX3CR1       | HsCD00039929                   |
| CXCR7        | Loktev et al (2013)            |
| EDNRA        | HsCD00041282                   |
| F2R          | HsCD00040861                   |
| FFAR1        | HsCD00370297                   |
| FFAR2        | HsCD00370382                   |
| FFAR3        | HsCD00376618                   |
| GPR120/FFAR4 | HsCD00370484                   |
| GABBR1       | HsCD00379176                   |
| GPR137B      | HsCD00370878                   |
| GPR155       | HsCD00336437                   |
| GPR162       | HsCD00368863                   |
| GPRC5B       | HsCD00039692                   |
| LGR4         | HsCD00041437                   |
| LAPR1        | in house                       |
| MCHR1        | in house                       |
| NPY1R        | Loktev et al (2013)            |
| P2RY1        | HsCD00378410                   |
| P2RY4        | HsCD00370576                   |
| PTGFR        | HsCD00039806                   |
| PTGIR        | HsCD00438287                   |
| QRFPR        | Loktev et al (2013)            |
| S1PR3        | HsCD00375638                   |
| SMO          | HsCD00042333                   |
| SSTR4        | HsCD00370833                   |
